# Supplementary material
Source: PubMed Central journal article supplement (PMC6333211)
Supplement: NIHMS1510793-supplement-8.pdf [file NIHMS1510793-supplement-8.pdf]

**Table S1. Statistics of CryoEM Data Collection, Classification, and Refinement for the Dimeric GluN1/GluN2A at pH 7.4. Related to Figures 1, 2 and 4**

|                                      | DiNMDAR         | DiNMDAR        | DiNMDAR       | DiNMDAR       |
|--------------------------------------|-----------------|----------------|---------------|---------------|
| [Glutamate] (mM)                     | 1.0             | 1.0            | 1.0           | 1.0           |
| [Glycine] (mM)                       | 1.0             | 1.0            | 1.0           | 1.0           |
| [EDTA] (mM)                          | 1.0             | 0              | 0             | 3.0           |
| [ZnCl <sub>2</sub> ] (μM)            | 0               | 1.0            | 1,000         | 1,000         |
| pH                                   | 7.4             | 7.4            | 7.4           | 7.4           |
| Antagonist Used for Expression       | Memantine       | Memantine      | Memantine     | Memantine     |
| <b>Data Collection/Processing</b>    |                 |                |               |               |
| Microscope                           | Krios (Janelia) | Krios (OHSU)   | Krios (OHSU)  | Krios (OHSU)  |
| Voltage (kV)                         | 300             | 300            | 300           | 300           |
| Defocus Range (μm)                   | -1.3 – -2.5     | -1.3 – -2.6    | -1.2 – -2.4   | -1.2 – -2.2   |
| Exposure time (s)                    | 10              | 22             | 22            | 22            |
| Dose rate (e/Å <sup>2</sup> /s)      | 5.5             | 2.5            | 2.4           | 2.4           |
| Pixel Size (Å)                       | 1.32            | 1.71           | 1.71          | 1.71          |
| Number of Frames                     | 50              | 80 – 96        | 88            | 88            |
| Micrographs                          | 2,667           | 1,653          | 1,068         | 714           |
| Particles Processed (Reference Free) | 695,027         | 491,476        | 248,810       | 286,226       |
| Particles Processed (Template-Based) | 1,256,436       | 950,166        | 468,703       | 427,834       |
| Combined Particles after 2D Cleanup  | 181,664         | 270,711        | 105,778       | 84,260        |
| <b>3D Classification</b>             |                 |                |               |               |
| Class 1 Name                         | 2 Knuckle Sym   | 2 Knuckle Asym | Extended 2    | 2 Knuckle Sym |
| Refined Particles                    | 88,979          | 52,489         | 23,049        | 47,313        |
| Masked Resolution                    | 6.23 Å          | 7.14 Å         | 8.21 Å        | 5.13 Å        |
| Class 2 Name                         |                 | 1 Knuckle      | Splayed Open  |               |
| Refined Particles                    |                 | 64,045         | 9,129         |               |
| Masked Resolution                    |                 | 6.08 Å         | 8.93 Å        |               |
| Class 3 Name                         |                 | Extended       | Super Splayed |               |
| Refined Particles                    |                 | 47,299         | 6,081         |               |
| Masked Resolution                    |                 | 6.84 Å         | 16.5 Å        |               |

**Table S2. Statistics of CryoEM Data Collection, Classification, and Refinement for the Dimeric GluN1/GluN2A at pH 8.0 and pH 6.1. Related to Figures 2 and 4**

|                                          | DiNMDAR       | DiNMDAR       | DiNMDAR       |
|------------------------------------------|---------------|---------------|---------------|
| [Glutamate] (mM)                         | 1.0           | 1.0           | 1.0           |
| [Glycine] (mM)                           | 1.0           | 1.0           | 1.0           |
| [EDTA] (mM)                              | 0.1           | 0             | 0             |
| [ZnCl <sub>2</sub> ] (μM)                | 0             | 1.0           | 1.0           |
| pH                                       | 8.0           | 8.0           | 6.1           |
| Antagonist Used for Expression           | MK-801        | MK-801        | Memantine     |
| <b><i>Data Collection/Processing</i></b> |               |               |               |
| Microscope                               | Krios (OHSU)  | Krios (OHSU)  | Krios (OHSU)  |
| Voltage (kV)                             | 300           | 300           | 300           |
| Defocus Range (μm)                       | -1.0 – -2.5   | -1.0 – -2.5   | -0.8 – -2.6   |
| Exposure time (s)                        | 20            | 20            | 22            |
| Dose rate (e/Å <sup>2</sup> /s)          | 2.6           | 2.6           | 2.4           |
| Pixel Size (Å)                           | 1.71          | 1.71          | 1.71          |
| Number of Frames                         | 80            | 80            | 88            |
| Micrographs                              | 1,841         | 1,605         | 2,163         |
| Particles Processed (Reference Free)     | 466,631       | 618,512       | 1,228,202     |
| Particles Processed (Template-Based)     |               |               | 1,284,550     |
| Combined Particles after 2D Cleanup      | 183,139       | 314,419       | 326,255       |
| <b><i>3D Classification</i></b>          |               |               |               |
| Class 1 Name                             | 2 Knuckle Sym | 2 Knuckle Sym | 1 Knuckle     |
| Refined Particles                        | 84,793        | 104,520       | 94,934        |
| Masked Resolution                        | 6.88 Å        | 7.51 Å        | 5.97 Å        |
| Class 2 Name                             |               |               | Extended      |
| Refined Particles                        |               |               | 86,310        |
| Masked Resolution                        |               |               | 6.31 Å        |
| Class 3 Name                             |               |               | Super Splayed |
| Refined Particles                        |               |               | 10,238        |
| Masked Resolution                        |               |               | 12.7 Å        |

**Table S3. Statistics of CryoEM Data Collection, Classification, and Refinement for the Triheteromeric GluN1/GluN2A/GluN2A\* at pH 7.4. Related to Figures 2 and 3**

|                                               | TriNMDAR      | TriNMDAR               |
|-----------------------------------------------|---------------|------------------------|
| [Glutamate] (mM)                              | 1.0           | 1.0                    |
| [Glycine] (mM)                                | 1.0           | 1.0                    |
| [EDTA] (mM)                                   | 1.0           | 0                      |
| [ZnCl <sub>2</sub> ] (μM)                     | 0             | 1.0                    |
| pH                                            | 7.4           | 7.4                    |
| Antagonist Used for Expression                | Memantine     | Memantine              |
| <b><i>Data Collection/Processing</i></b>      |               |                        |
| Microscope                                    | Krios (OHSU)  | Krios (OHSU)           |
| Voltage (kV)                                  | 300           | 300                    |
| Defocus Range (μm)                            | -1.2 – -2.4   | -1.1 – -2.6            |
| Exposure time (s)                             | 22            | 22                     |
| Dose rate (e <sup>-</sup> /Å <sup>2</sup> /s) | 2.4           | 2.4                    |
| Pixel Size (Å)                                | 1.71          | 1.71                   |
| Number of Frames                              | 88            | 88                     |
| Micrographs                                   | 690           | 1,891                  |
| Particles Processed (Reference Free)          | 275,599       | 720,692                |
| Particles Processed (Template-Based)          | 416,121       | 1,523,115              |
| Combined Particles after 2D Cleanup           | 52,342        | 244,286                |
| <b><i>3D Classification</i></b>               |               |                        |
| Class 1 Name                                  | 2 Knuckle Sym | 2 Knuckle Sym          |
| Refined Particles                             | 33,349        | 58,461                 |
| Masked Resolution                             | 5.38 Å        | 6.20 Å                 |
| Class 2 Name                                  |               | 2 Knuckle Asym         |
| Refined Particles                             |               | 68,275                 |
| Masked Resolution                             |               | 5.30 Å<br>(ECD 4.71 Å) |
| Class 3 Name                                  |               | 1 Knuckle              |
| Refined Particles                             |               | 32,232                 |
| Masked Resolution                             |               | 7.46 Å                 |
| Class 4 Name                                  |               | Extended               |
| Refined Particles                             |               | 40,881                 |
| Masked Resolution                             |               | 6.99                   |
