# Supplementary material
Source: PubMed Central journal article supplement (PMC6333211)

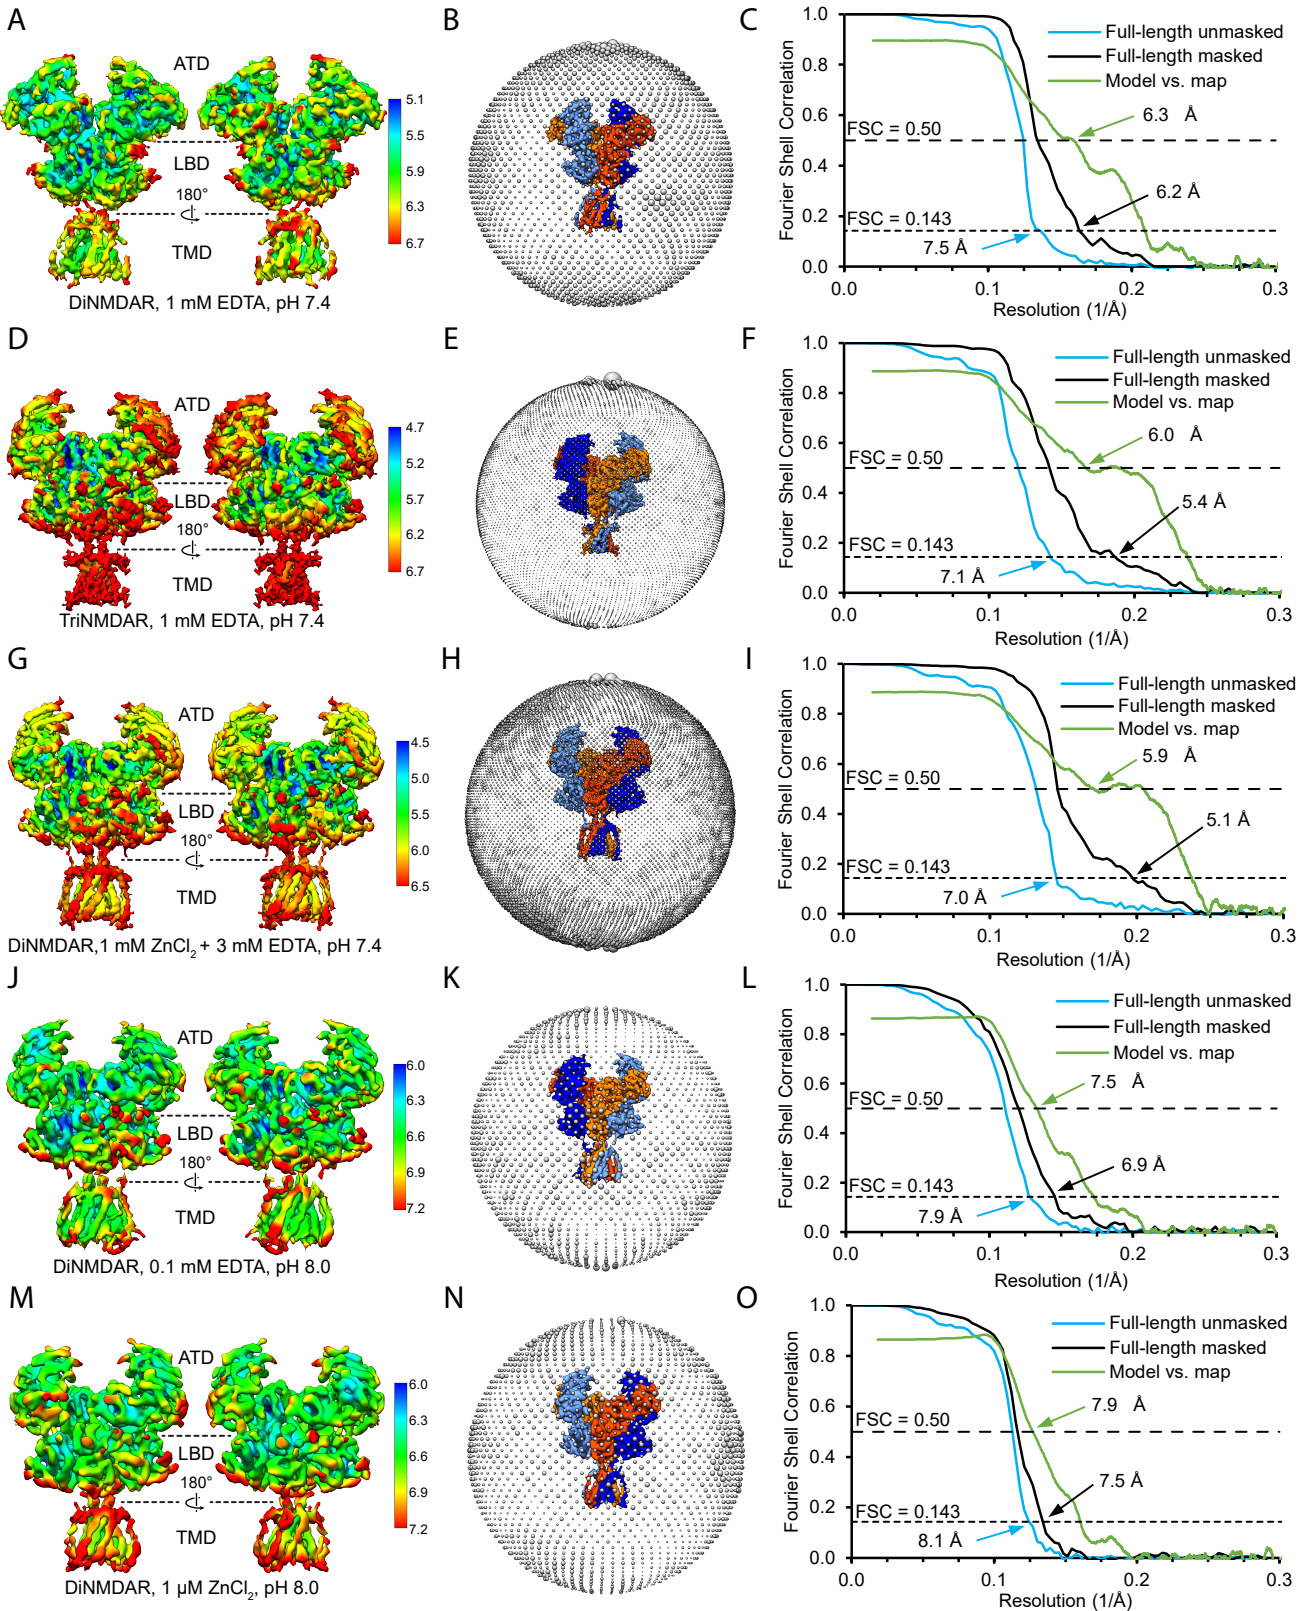

Supplement: NIHMS1510793-supplement-2.pdf [file NIHMS1510793-supplement-2.pdf]

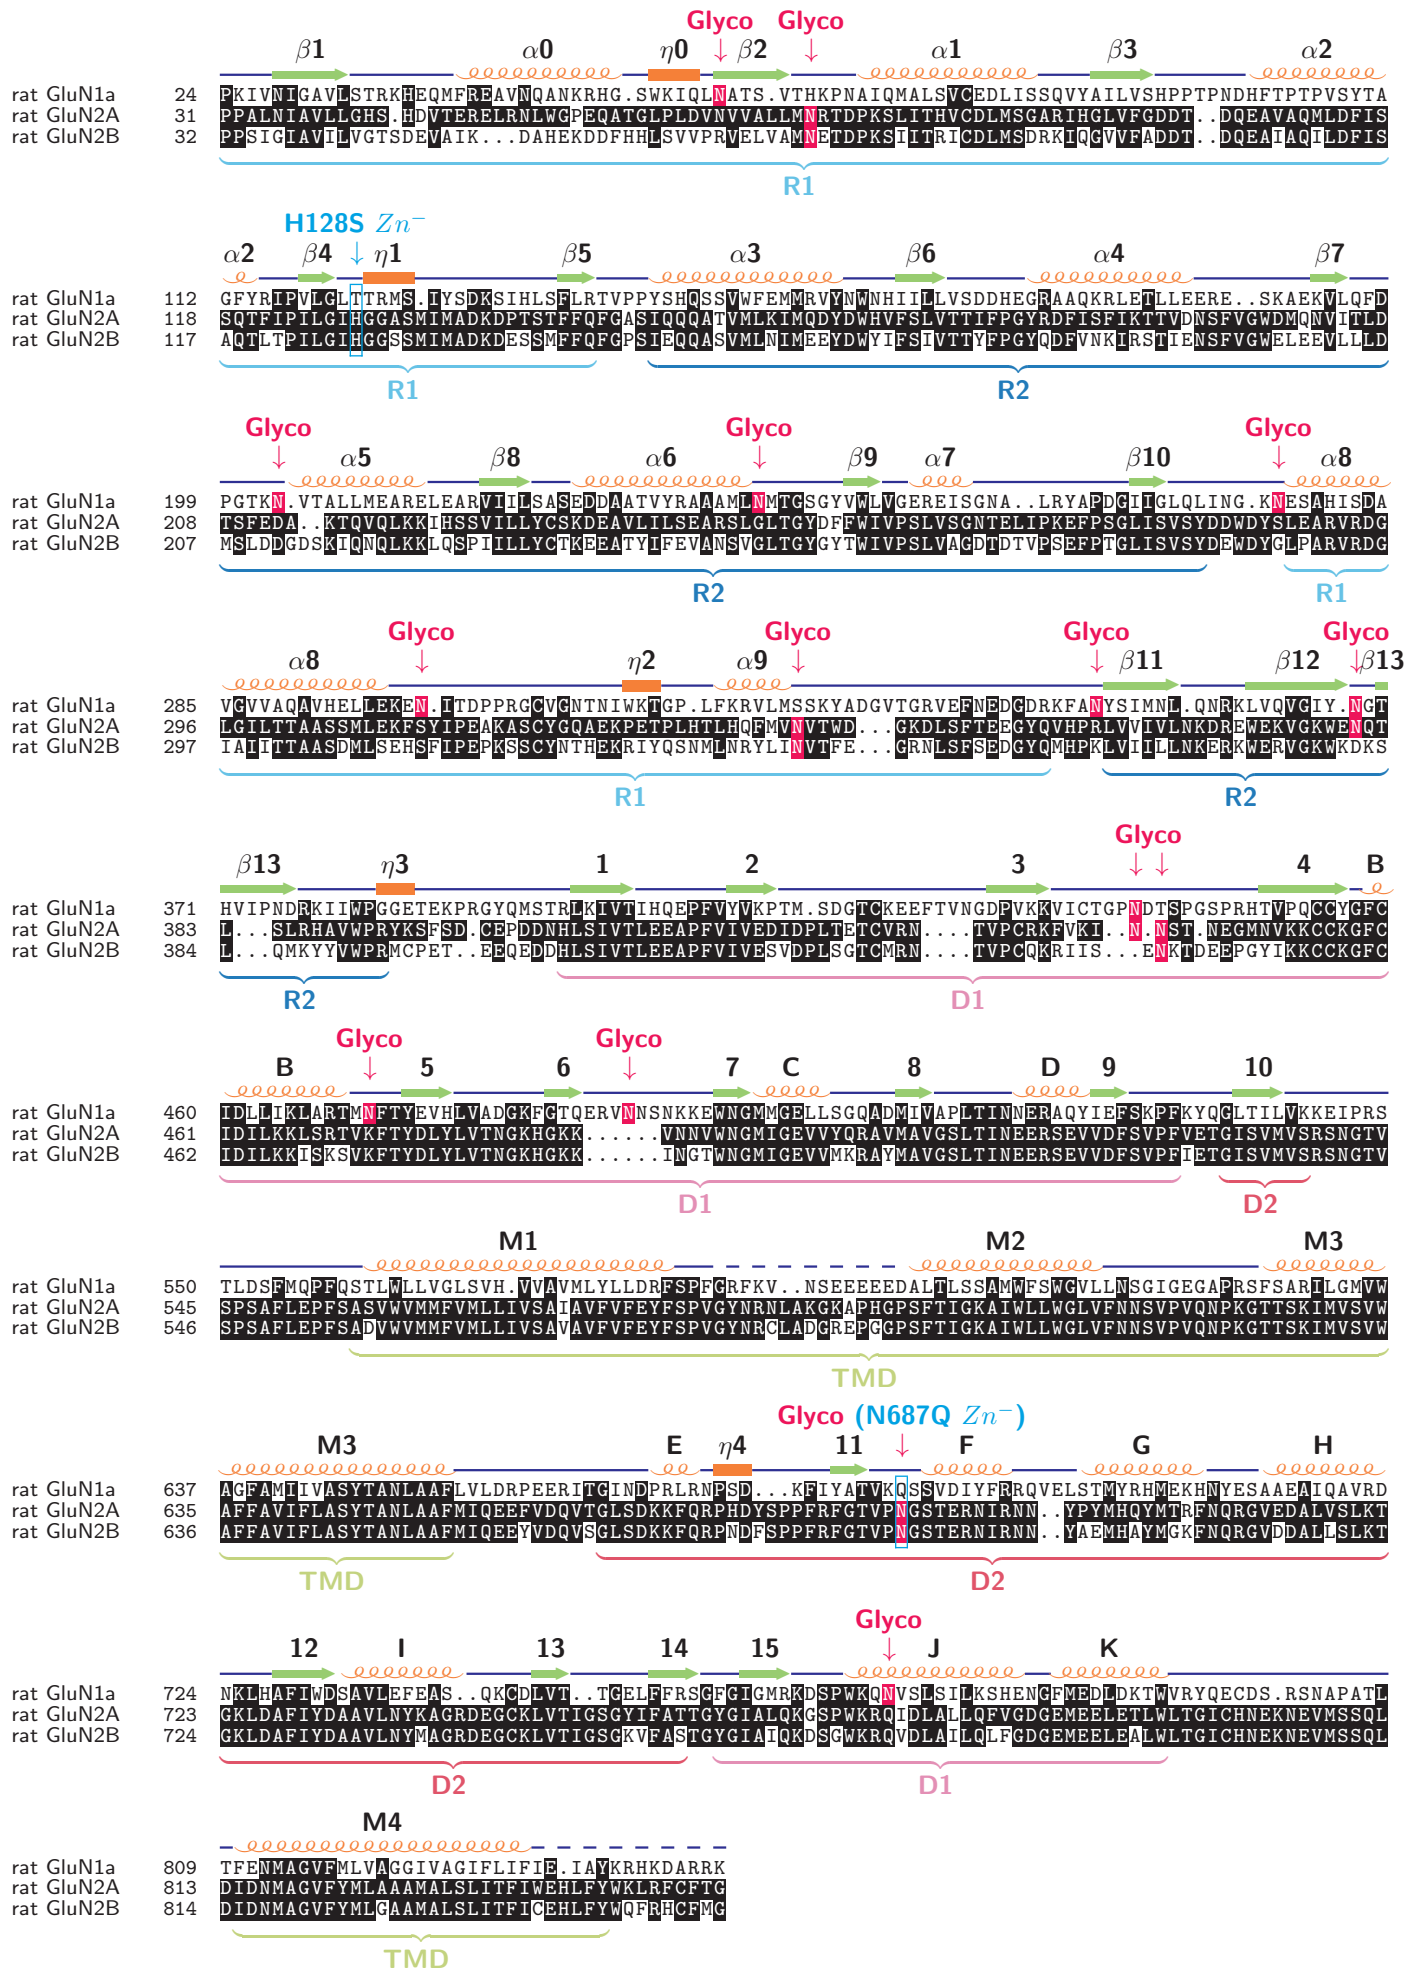

Supplement: NIHMS1510793-supplement-3.pdf [file NIHMS1510793-supplement-3.pdf]
